# Supplementary material
Source: ML conference proceedings conference paper supplement (https://openaccess.thecvf.com/content/ICCV_2019/html/Li_Episodic_Training_for_ICCV_2019_paper.html)
Supplement: Supplementary file 1 [file Li_Episodic_Training_for_ICCV_2019_supplemental.pdf]

| Target | AGG  | Ensemble | Epi-FCR(S2B) | First Blk | Third Blk | Fixed DSNN | Epi-FCR |
|--------|------|----------|--------------|-----------|-----------|------------|---------|
| A.     | 77.6 | 79.3     | 80.4         | 78.8      | 81.0      | 79.1       | 82.1    |
| C.     | 73.9 | 75.9     | 75.3         | 75.5      | 75.6      | 76.6       | 77.0    |
| P.     | 94.4 | 95.4     | 94.4         | 93.7      | 92.2      | 93.5       | 93.9    |
| S.     | 70.3 | 71.2     | 73.4         | 74.5      | 74.1      | 74.7       | 73.0    |
| Ave.   | 79.1 | 80.4     | 80.9         | 80.6      | 80.7      | 80.9       | 81.5    |

Table 7: Further evaluation on PACS using ResNet-18.

## A. Additional analysis

We conduct some analysis to better understand our episodic training method, and its contributions.

**Comparison model ensemble** In our current implementation of episodic training, besides the AGG model we regularize,  $n$  domain-specific branches are used for generating DG episodes. In this way, it increases the total parameters during training to  $n+1$  times that of AGG, although in the end only a single AGG branch is used for testing. To verify that the benefit is not solely due to additional parameters, we compare our episodic-training method with the ensemble of  $n+1$  AGG models on PACS using ResNet-18. The result in Table 7 shows that our episodic training is more effective than the ensemble model. Crucially this is despite the fact that Epi-FCR is  $1/(n+1)$ th the size of the full ensemble during testing.

**Flexibility of episodic training** a) *Global sharing parameters*: In our current demonstration, we use  $n+1$  branches to conduct the episodic training. To reduce the total trainable parameters, we can also globally share the bottom feature layers and episodic-train the rest feature layers and classifier. For example, globally sharing the first two blocks and episodic-training the remaining parameters still leads to a 1.8% improvement over the baseline (see Table 7, S2B). b) *Intermediate feature layers*: Applying episodic training around a typical feature vs classifier module split is intuitive, but other options are possible. For example, we evaluate splitting the modules at intermediate feature layers: first block, and third block of ResNet-18 on PACS. The results, in Table 7 (First Blk and Third Blk), show that episodic training can also work with intermediate layer splits, but the original design is better. c) *Fixed domain-specific branches*: Currently, we train the domain-specific classification losses and the episodic training losses jointly. We also evaluate our episodic training using the pre-trained domain-specific branches. From the result in Table 7 (Fixed DSNN), we can see that episodic training using fixed domain-specific branches is still effective with 1.8% performance improvement over AGG.
